# Supplementary material for: Simple and cost-effective synthesis of graphene by electrochemical exfoliation of graphite rods
Source: Royal Society of Chemistry journal article supplement (doi:10.1039/c5ra19277c), 2015-12-22
Supplement: c5ra19277c1.pdf [file c5ra19277c1.pdf]

## Electronic Supplementary Information

### Simple and cost-effective synthesis of graphene by electrochemical exfoliation of graphite rods

Maria Coroș\*, Florina Pogăcean, Marcela-Corina Roșu, Crina Socaci, Gheorghe Borodi,  
Lidia Magerușan, Alexandru R. Biriș and Stela Pruneanu\*

*National Institute for Research and Development of Isotopic and Molecular Technologies, 67-  
103 Donat, 400293 Cluj-Napoca, Romania*

#### 3.1.1. Selection of the graphite rod

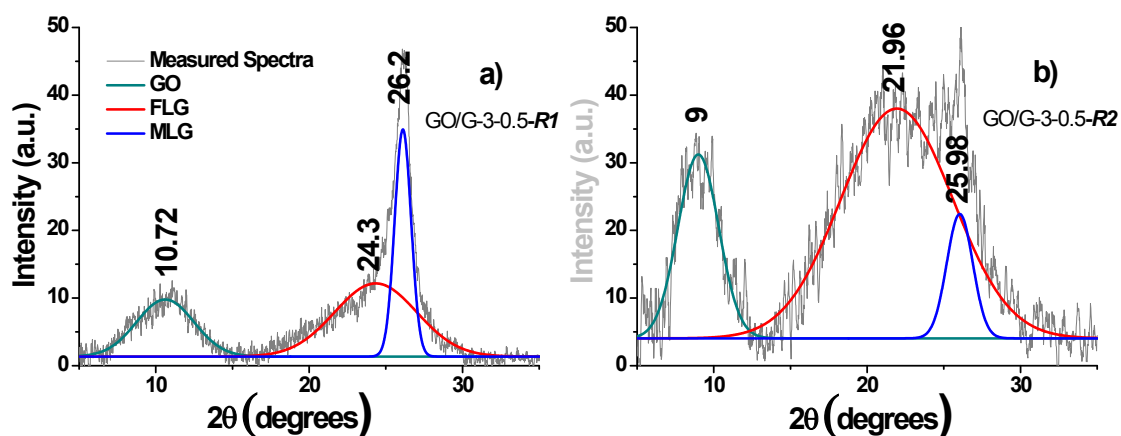

**Fig. S1** The XRD patterns of the exfoliated samples obtained from two different graphite rods: a) R1 and b) R2.

**Table S1** The number of layers (n) and interlayer distance (d) of the samples prepared from different graphite rods

| <b>Sample</b>        | <b>n</b>  |            |            | <b>d (nm)</b> |            |            |
|----------------------|-----------|------------|------------|---------------|------------|------------|
|                      | <b>GO</b> | <b>FLG</b> | <b>MLG</b> | <b>GO</b>     | <b>FLG</b> | <b>MLG</b> |
| <i>GO/G-3-0.5-R1</i> | 2         | 4          | 20         | 0.828         | 0.368      | 0.34       |
| <i>GO/G-3-0.5-R2</i> | 3         | 2          | 13         | 0.981         | 0.40       | 0.34       |

**Table S2** The amount (%) of each type of graphene present in the samples prepared from different graphite rods

| <b>Sample</b>   | <i>GO/G-3-0.5-R1</i> | <i>GO/G-3-0.5-R2</i> |
|-----------------|----------------------|----------------------|
| <b>% of GO</b>  | 25                   | 20                   |
| <b>% of FLG</b> | 46                   | 71                   |
| <b>% of MLG</b> | <b>29</b>            | <b>9</b>             |
